# Supplementary material for: Bioremediation Potential of Duckweed (Lemna Gibba) in The Decolorization of C.I. Basic Green 4 and Chlorophyll a Fluorescence Analysis: Understanding Plant Performance
Source: Research Square preprint supplement (doi:10.21203/rs.3.rs-144187/v1), 2021-01-15
Supplement: Supplementary file 1 [file 339c56c77063fe80a0bd070a.docx]

Table 2. Composition of Jacob’s medium.

| Stock Solution | Composition | Concentration (g l-1) |
| --- | --- | --- |
| A | Ca (NO3)2 | 60.000 |
| B | MgSO4·7H2O  KNO3  KH2PO4 | 102.000  100.000  14.000 |
| C | H3BO4  MnCl2·4H2O  ZnSO4·7H2O  Na2MoO4·2H2O | 0.3000  0.3145  0.0356  0.0118 |
| D | CuSO4·5H2O  FeEDTA* | 0.0125  1.8520 |

*Ethylenediaminetetraacetatic acid. Experiment media were prepared by taking 10 ml aliquot of each of the stock solutions and makeup up to 1 L in a volumetric flask.
