# Supplementary material for: Bioremediation Potential of Duckweed (Lemna Gibba) in The Decolorization of C.I. Basic Green 4 and Chlorophyll a Fluorescence Analysis: Understanding Plant Performance
Source: Research Square preprint supplement (doi:10.21203/rs.3.rs-144187/v1), 2021-01-15
Supplement: Supplementary file 3 [file d0955ca86e381ffe05cf4663.docx]

Table 4. Chl *a* fluorescence parameter of *L. gibba* grow under pre- and post- BG4 treatment.

|  | PHI(Po) | ABS/RC | TRo/RC | ETo/RC | RC/CSm | ABS/CSm | TRo/CSm | ETo/CSm |
| --- | --- | --- | --- | --- | --- | --- | --- | --- |
| Control | 0.79±0.004 | 1.42±0.002 | 1.12±0.007 | 0.81±0.008 | 844.70±1.529 | 1205±3.606 | 945.85±3.343 | 687.84±2.263 |
| After 12 hours | 0.80±0.0005 | 1.20±0.001 | 0.95±0.002 | 0.74±0.001 | 910.36±1.452 | 1078±2.646 | 866.03±2.524 | 672.66±3.045 |

Values are presented in the average of triplicates ±SD.
