# Supplementary material for: Bioremediation Potential of Duckweed (Lemna Gibba) in The Decolorization of C.I. Basic Green 4 and Chlorophyll a Fluorescence Analysis: Understanding Plant Performance
Source: Research Square preprint supplement (doi:10.21203/rs.3.rs-144187/v1), 2021-01-15
Supplement: Supplementary file 4 [file fe3707d12e5597eee93e53c7.docx]

| **S. No.** | **Parameters** | **Unit** | **Range** |
| --- | --- | --- | --- |
| **Water properties** | | | |
| 1 | Colour |  | Dark Brown |
| 2 | pH |  | 7.2 -8.1 |
| 3 | Conductivity | mS/cm | 0.35 - 0.58 |
| 4 | Total Dissolved Solids (TDS) | ppm | 560 - 993 |
| 5 | Dissolved Oxygen | ppm | 0.11 - 0.39 |
| 6 | BOD | ppm | 55.3 - 86 |
| 7 | COD | ppm | 159 - 216 |
| 8 | Alkalinity | ppm | 298 - 320 |
| 9 | Total Hardness (As CaCO3) | ppm | 565 - 286 |
| 10 | Sulphate (As SO4) | ppm | 75.6 – 89.6 |
| 11 | Chloride (As Cl-) | ppm | 486 - 796 |
| 12 | Fluoride (F-) | ppm | 8.4 – 8.9 |
| 13 | Silica (As SiO2) | ppm | 39 – 68 |
| 14 | Sodium | ppm | 22.5- 187 |
| 15 | Total Organic Carbon (TOC) | ppm | 11 – 18 |
| **Environmental Conditions** | | | |
| 1. | Temperature | OC | 20-25 |
| 2. | Humidity | % | 67 |

Table 1: Water properties and environmental conditions of sample collection site.
