# Supplementary material for: Bioremediation Potential of Duckweed (Lemna Gibba) in The Decolorization of C.I. Basic Green 4 and Chlorophyll a Fluorescence Analysis: Understanding Plant Performance
Source: Research Square preprint supplement (doi:10.21203/rs.3.rs-144187/v1), 2021-01-15
Supplement: Supplementary file 5 [file 75396a7923595072d4e7f086.docx]

Table 3. Chemical structure and characterization of BG4

| Chemical structure | 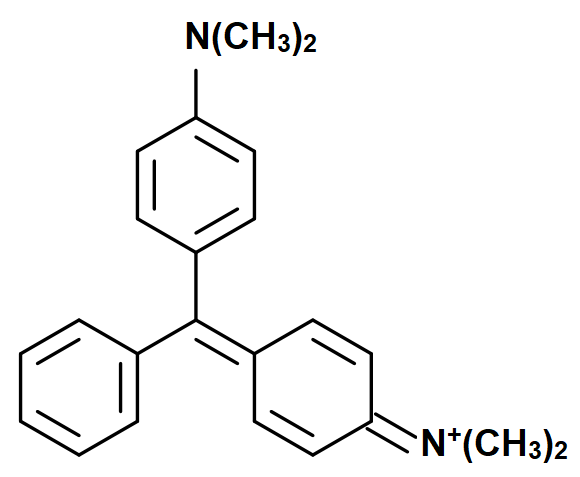 |
| --- | --- |
| C.I. Name | C.I. Basic green 4 |
| Molecular formula | C23H26N2O.HCl |
| C.I. Number | 42000 |
| MW (g/mol) | 382.9 |
| λmax (nm) | 619 |
